# Supplementary material for: The dynamic interplay between intramolecular and intermolecular interactions in mononuclear manganese(iii) SCO complexes
Source: Royal Society of Chemistry journal article supplement (doi:10.1039/d0dt04109b), 2021-01-01
Supplement: d0dt04109b1.pdf [file d0dt04109b1.pdf]

## Supporting Information

### The Dynamic Interplay between Intramolecular and Intermolecular Interactions in Mononuclear Manganese(III) SCO Complexes

Chun-Yan Qin<sup>a</sup>• Sheng-Ze Zhao<sup>a</sup>• Hua-Yu Wu<sup>a</sup>• Yong-Hua Li<sup>a\*</sup>• Zi-Kun Wang<sup>a</sup>• Zheng Wang<sup>b\*</sup>• Shi Wang<sup>a\*</sup>

<sup>a</sup> State Key Laboratory of Organic Electronics and Information Displays & Institute of Advanced Materials (IAM), Nanjing University of Posts & Telecommunications, 9 Wenyuan Road, Nanjing 210023, China.

<sup>b</sup> College of Chemistry and Chemical Engineering, Key Laboratory of Chemical Additives for China National Light Industry, Shaanxi University of Science and Technology, Xi'an 710021, China

Table S1. Crystallographic Data for 1–8.

| CCDC number       | PF <sub>6</sub>                                                                  |                                                                                  | AsF <sub>6</sub>                                                                 |                                                                                  | SbF <sub>6</sub>                                                                  |                                                                                   | BF <sub>4</sub>                                                                 |                                                                                 |
|-------------------|----------------------------------------------------------------------------------|----------------------------------------------------------------------------------|----------------------------------------------------------------------------------|----------------------------------------------------------------------------------|-----------------------------------------------------------------------------------|-----------------------------------------------------------------------------------|---------------------------------------------------------------------------------|---------------------------------------------------------------------------------|
|                   | 2023564                                                                          | 2323563                                                                          | 2023552                                                                          | 2023551                                                                          | 2023566                                                                           | 2023565                                                                           | 2023554                                                                         | 2023553                                                                         |
| Empirical formula | C <sub>22</sub> H <sub>26</sub> F <sub>8</sub> MnN <sub>4</sub> O <sub>2</sub> P | C <sub>22</sub> H <sub>26</sub> F <sub>8</sub> MnN <sub>4</sub> O <sub>2</sub> P | C <sub>22</sub> H <sub>26</sub> AsF <sub>8</sub> MnN <sub>4</sub> O <sub>2</sub> | C <sub>22</sub> H <sub>26</sub> AsF <sub>8</sub> MnN <sub>4</sub> O <sub>2</sub> | C <sub>22</sub> H <sub>26</sub> F <sub>8</sub> MnN <sub>4</sub> O <sub>2</sub> Sb | C <sub>22</sub> H <sub>26</sub> F <sub>8</sub> MnN <sub>4</sub> O <sub>2</sub> Sb | C <sub>22</sub> H <sub>26</sub> BF <sub>6</sub> MnN <sub>4</sub> O <sub>2</sub> | C <sub>22</sub> H <sub>26</sub> BF <sub>6</sub> MnN <sub>4</sub> O <sub>2</sub> |
| Formula weight    | 616.38                                                                           | 616.38                                                                           | 660.33                                                                           | 660.33                                                                           | 707.16                                                                            | 707.17                                                                            | 558.22                                                                          | 558.22                                                                          |
| Temperature/K     | 298(2)                                                                           | 100(2)                                                                           | 298(2)                                                                           | 100(2)                                                                           | 298(2)                                                                            | 100(2)                                                                            | 298.15                                                                          | 100(2)                                                                          |
| Crystal system    | monoclinic                                                                       | monoclinic                                                                       | monoclinic                                                                       | monoclinic                                                                       | monoclinic                                                                        | monoclinic                                                                        | monoclinic                                                                      | monoclinic                                                                      |
| Space group       | P2/n                                                                             | P2/n                                                                             | P2/n                                                                             | P2/n                                                                             | P2/n                                                                              | P2/n                                                                              | P2 <sub>1</sub> /c                                                              | P2 <sub>1</sub> /c                                                              |
| a/Å               | 11.530(4)                                                                        | 11.3518(16)                                                                      | 11.5522(11)                                                                      | 11.3909(12)                                                                      | 11.6715(9)                                                                        | 11.554(6)                                                                         | 9.7586(15)                                                                      | 9.5085(10)                                                                      |
| b/Å               | 8.107(3)                                                                         | 8.0856(11)                                                                       | 8.1697(8)                                                                        | 8.1489(8)                                                                        | 8.2695(6)                                                                         | 8.271(4)                                                                          | 17.613(2)                                                                       | 17.3942(18)                                                                     |
| c/Å               | 13.414(4)                                                                        | 13.2427(18)                                                                      | 13.4202(11)                                                                      | 13.2933(14)                                                                      | 13.5489(10)                                                                       | 13.523(6)                                                                         | 14.820(2)                                                                       | 14.6462(15)                                                                     |
| α/°               | 90                                                                               | 90                                                                               | 90                                                                               | 90                                                                               | 90                                                                                | 90                                                                                | 90                                                                              | 90                                                                              |
| β/°               | 94.156(9)                                                                        | 93.667(3)                                                                        | 94.453(2)                                                                        | 93.862(2)                                                                        | 94.836(2)                                                                         | 94.080(11)                                                                        | 106.582(3)                                                                      | 104.778(2)                                                                      |
| γ/°               | 90                                                                               | 90                                                                               | 90                                                                               | 90                                                                               | 90                                                                                | 90                                                                                | 90                                                                              | 90                                                                              |

|                                                |                                                                     |                                                                     |                                                                     |                                                                     |                                                                     |                                                                     |                                                                     |                                                                     |
|------------------------------------------------|---------------------------------------------------------------------|---------------------------------------------------------------------|---------------------------------------------------------------------|---------------------------------------------------------------------|---------------------------------------------------------------------|---------------------------------------------------------------------|---------------------------------------------------------------------|---------------------------------------------------------------------|
| Volume/Å <sup>3</sup>                          | 1250.6(7)                                                           | 1213.0(3)                                                           | 1262.8(2)                                                           | 1231.1(2)                                                           | 1303.05(17)                                                         | 1289.0(11)                                                          | 2441.2(6)                                                           | 2342.2(4)                                                           |
| Z                                              | 2                                                                   | 2                                                                   | 2                                                                   | 2                                                                   | 2                                                                   | 2                                                                   | 4                                                                   | 4                                                                   |
| $\rho_{\text{calc}}/\text{cm}^3$               | 1.637                                                               | 1.688                                                               | 1.737                                                               | 1.781                                                               | 1.802                                                               | 1.822                                                               | 1.519                                                               | 1.583                                                               |
| $\mu/\text{mm}^{-1}$                           | 0.680                                                               | 0.702                                                               | 1.911                                                               | 1.960                                                               | 1.606                                                               | 1.624                                                               | 0.614                                                               | 0.640                                                               |
| F(000)                                         | 628.0                                                               | 628.0                                                               | 664.0                                                               | 664.0                                                               | 700.0                                                               | 700.0                                                               | 1144.0                                                              | 1144.0                                                              |
| Crystal size/mm <sup>3</sup>                   | 0.11 × 0.08 × 0.07                                                  | 0.28 × 0.20 × 0.12                                                  | 0.22 × 0.15 × 0.10                                                  | 0.11 × 0.1 × 0.07                                                   | 0.25 × 0.21 × 0.15                                                  | 0.25 × 0.21 × 0.15                                                  | 0.11 × 0.1 × 0.07                                                   | 0.26 × 0.20 × 0.14                                                  |
| Radiation                                      | MoK $\alpha$<br>( $\lambda = 0.71073$ )                             |
| 2 $\theta$ range for data collection/°         | 5.024 to 56.516                                                     | 4.884 to 50.05                                                      | 4.484 to 66.122                                                     | 4.56 to 75.532                                                      | 4.812 to 65.442                                                     | 4.482 to 53.992                                                     | 4.356 to 50.02                                                      | 4.43 to 50.05                                                       |
| Index ranges                                   | -10 ≤ h ≤ 15,<br>-10 ≤ k ≤ 10,<br>-17 ≤ l ≤ 16                      | -13 ≤ h ≤ 11,<br>-9 ≤ k ≤ 9,<br>-15 ≤ l ≤ 15                        | -16 ≤ h ≤ 17,<br>-12 ≤ k ≤ 7,<br>-18 ≤ l ≤ 20                       | -19 ≤ h ≤ 17,<br>-13 ≤ k ≤ 13,<br>-22 ≤ l ≤ 18                      | -17 ≤ h ≤ 17,<br>-8 ≤ k ≤ 12,<br>-20 ≤ l ≤ 19                       | -14 ≤ h ≤ 14,<br>-5 ≤ k ≤ 10,<br>-16 ≤ l ≤ 17                       | -11 ≤ h ≤ 10,<br>-16 ≤ k ≤ 20,<br>-17 ≤ l ≤ 16                      | -7 ≤ h ≤ 11,<br>-20 ≤ k ≤ 20,<br>-17 ≤ l ≤ 17                       |
| Reflections collected                          | 8982                                                                | 7199                                                                | 15086                                                               | 16498                                                               | 14763                                                               | 7540                                                                | 15964                                                               | 15291                                                               |
| Independent reflections                        | 3103<br>[R <sub>int</sub> = 0.0401,<br>R <sub>sigma</sub> = 0.0407] | 2151<br>[R <sub>int</sub> = 0.0255,<br>R <sub>sigma</sub> = 0.0255] | 4791<br>[R <sub>int</sub> = 0.0836, R <sub>sigma</sub><br>= 0.0630] | 6597<br>[R <sub>int</sub> = 0.0285,<br>R <sub>sigma</sub> = 0.0325] | 4803<br>[R <sub>int</sub> = 0.0267,<br>R <sub>sigma</sub> = 0.0305] | 2823<br>[R <sub>int</sub> = 0.0456,<br>R <sub>sigma</sub> = 0.0510] | 4303<br>[R <sub>int</sub> = 0.0248,<br>R <sub>sigma</sub> = 0.0232] | 4136<br>[R <sub>int</sub> = 0.0344,<br>R <sub>sigma</sub> = 0.0332] |
| Data/restraints/parameters                     | 3103/25/196                                                         | 2151/0/178                                                          | 4791/0/178                                                          | 6597/0/174                                                          | 4803/0/178                                                          | 2823/0/178                                                          | 4303/69/371                                                         | 4136/0/333                                                          |
| Goodness-of-fit on F <sup>2</sup>              | 1.044                                                               | 1.064                                                               | 1.047                                                               | 1.075                                                               | 1.053                                                               | 1.088                                                               | 1.143                                                               | 1.041                                                               |
| Final R indexes [I ≥ 2 $\sigma$<br>(I)]        | R <sub>1</sub> = 0.0485,<br>wR <sub>2</sub> = 0.1269                | R <sub>1</sub> = 0.0240,<br>wR <sub>2</sub> = 0.0590                | R <sub>1</sub> = 0.0521,<br>wR <sub>2</sub> = 0.1304                | R <sub>1</sub> = 0.0293,<br>wR <sub>2</sub> = 0.0718                | R <sub>1</sub> = 0.0332,<br>wR <sub>2</sub> = 0.0718                | R <sub>1</sub> = 0.0410,<br>wR <sub>2</sub> = 0.1459                | R <sub>1</sub> = 0.0370,<br>wR <sub>2</sub> = 0.0977                | R <sub>1</sub> = 0.0287,<br>wR <sub>2</sub> = 0.0687                |
| Final R indexes [all<br>data]                  | R <sub>1</sub> = 0.0607,<br>wR <sub>2</sub> = 0.1342                | R <sub>1</sub> = 0.0264,<br>wR <sub>2</sub> = 0.0602                | R <sub>1</sub> = 0.0948,<br>wR <sub>2</sub> = 0.1625                | R <sub>1</sub> = 0.0365,<br>wR <sub>2</sub> = 0.0754                | R <sub>1</sub> = 0.0545,<br>wR <sub>2</sub> = 0.0788                | R <sub>1</sub> = 0.0456,<br>wR <sub>2</sub> = 0.1513                | R <sub>1</sub> = 0.0476,<br>wR <sub>2</sub> = 0.1153                | R <sub>1</sub> = 0.0322,<br>wR <sub>2</sub> = 0.0708                |
| Largest diff. peak/hole /<br>e Å <sup>-3</sup> | 0.92/-0.44                                                          | 0.31/-0.33                                                          | 0.65/-1.24                                                          | 0.57/-0.98                                                          | 0.54/-0.82                                                          | 1.44/-1.52                                                          | 0.28/-0.44                                                          | 0.33/-0.36                                                          |

**ClO<sub>4</sub>**

**Cl**

**Br**

**I**

| CCDC number                                    | 2023560                                                                | 2023559                                                                | 2023558                                                                | 2023557                                                              | 2023556                                                              | 2023555                                                              | 2023562                                                               | 2023561                                                              |
|------------------------------------------------|------------------------------------------------------------------------|------------------------------------------------------------------------|------------------------------------------------------------------------|----------------------------------------------------------------------|----------------------------------------------------------------------|----------------------------------------------------------------------|-----------------------------------------------------------------------|----------------------------------------------------------------------|
| Empirical formula                              | $C_{22}H_{26}ClF_2MnN_4O_6$                                            | $C_{22}H_{26}ClF_2MnN_4O$                                              | $C_{22}H_{26}ClF_2MnN_4O_2$                                            | $C_{22}H_{26}ClF_2MnN_4O_2$                                          | $C_{22}H_{26}Br_{0.72}Cl_{0.28}F_2MnN_4O$                            | $C_{22}H_{26}Br_{0.71}Cl_{0.29}F_2MnN_4O_2$                          | $C_{22}H_{26}F_2IMnN_4O_2$                                            | $C_{22}H_{26}F_2IMnN_4O_2$                                           |
| Formula weight                                 | 570.86                                                                 | 570.86                                                                 | 506.86                                                                 | 506.86                                                               | 538.95                                                               | 538.46                                                               | 598.31                                                                | 598.31                                                               |
| Temperature/K                                  | 298(2)                                                                 | 100(2)                                                                 | 298(2)                                                                 | 100(2)                                                               | 298(2)                                                               | 100.05                                                               | 298(2)                                                                | 100.0                                                                |
| Crystal system                                 | monoclinic                                                             | monoclinic                                                             | orthorhombic                                                           | orthorhombic                                                         | orthorhombic                                                         | orthorhombic                                                         | orthorhombic                                                          | orthorhombic                                                         |
| Space group                                    | $P2_1/c$                                                               | $P2_1/c$                                                               | Pccn                                                                   | Pccn                                                                 | Pccn                                                                 | Pccn                                                                 | Pccn                                                                  | Pccn                                                                 |
| a/Å                                            | 9.831(4)                                                               | 9.6711(13)                                                             | 7.8670(9)                                                              | 7.665(3)                                                             | 8.0357(8)                                                            | 7.6696(13)                                                           | 8.5204(11)                                                            | 7.9166(16)                                                           |
| b/Å                                            | 17.819(7)                                                              | 17.599(2)                                                              | 16.136(2)                                                              | 16.221(6)                                                            | 16.0975(15)                                                          | 16.176(3)                                                            | 16.1865(19)                                                           | 16.279(3)                                                            |
| c/Å                                            | 14.782(6)                                                              | 14.657(2)                                                              | 17.6938(19)                                                            | 17.762(5)                                                            | 17.7115(17)                                                          | 17.944(3)                                                            | 17.696(2)                                                             | 18.585(4)                                                            |
| $\alpha/^\circ$                                | 90                                                                     | 90                                                                     | 90                                                                     | 90                                                                   | 90                                                                   | 90                                                                   | 90                                                                    | 90                                                                   |
| $\beta/^\circ$                                 | 106.738(9)                                                             | 106.072(3)                                                             | 90                                                                     | 90                                                                   | 90                                                                   | 90                                                                   | 90                                                                    | 90                                                                   |
| $\gamma/^\circ$                                | 90                                                                     | 90                                                                     | 90                                                                     | 90                                                                   | 90                                                                   | 90                                                                   | 90                                                                    | 90                                                                   |
| Volume/Å <sup>3</sup>                          | 2479.8(17)                                                             | 2397.0(6)                                                              | 2246.1(4)                                                              | 2208.5(13)                                                           | 2291.1(4)                                                            | 2226.2(7)                                                            | 2440.5(5)                                                             | 2395.1(8)                                                            |
| Z                                              | 4                                                                      | 4                                                                      | 4                                                                      | 4                                                                    | 4                                                                    | 4                                                                    | 4                                                                     | 4                                                                    |
| $\rho_{calc}/cm^3$                             | 1.529                                                                  | 1.582                                                                  | 1.499                                                                  | 1.525                                                                | 1.563                                                                | 1.606                                                                | 1.628                                                                 | 1.659                                                                |
| $\mu/mm^{-1}$                                  | 0.701                                                                  | 0.725                                                                  | 0.750                                                                  | 0.763                                                                | 1.911                                                                | 1.948                                                                | 1.846                                                                 | 1.881                                                                |
| F(000)                                         | 1176.0                                                                 | 1176.0                                                                 | 1048.0                                                                 | 1048.0                                                               | 1100.0                                                               | 1099.2                                                               | 1192.0                                                                | 1192.0                                                               |
| Crystal size/mm <sup>3</sup>                   | $0.28 \times 0.23 \times 0.20$                                         | $0.28 \times 0.23 \times 0.20$                                         | $0.26 \times 0.21 \times 0.18$                                         | $0.26 \times 0.21 \times 0.18$                                       | $0.11 \times 0.1 \times 0.09$                                        | $0.11 \times 0.1 \times 0.09$                                        | $0.26 \times 0.20 \times 0.14$                                        | $0.11 \times 0.1 \times 0.09$                                        |
| Radiation                                      | MoK $\alpha$<br>( $\lambda = 0.71073$ )                                | MoK $\alpha$<br>( $\lambda = 0.71073$ )                                | MoK $\alpha$<br>( $\lambda = 0.71073$ )                                | MoK $\alpha$ ( $\lambda = 0.71073$ )                                 | MoK $\alpha$<br>( $\lambda = 0.71073$ )                              | MoK $\alpha$<br>( $\lambda = 0.71073$ )                              | MoK $\alpha$<br>( $\lambda = 0.71073$ )                               | MoK $\alpha$<br>( $\lambda = 0.71073$ )                              |
| 2 $\theta$ range for data collection/ $^\circ$ | 4.572 to 56.492                                                        | 3.704 to 50.038                                                        | 4.604 to 56.652                                                        | 5.23 to 50.048                                                       | 5.25 to 50.05                                                        | 5.036 to 49.998                                                      | 4.604 to 52                                                           | 4.384 to 50.01                                                       |
| Index ranges                                   | $-13 \leq h \leq 10,$<br>$-23 \leq k \leq 22,$<br>$-19 \leq l \leq 19$ | $-11 \leq h \leq 11,$<br>$-19 \leq k \leq 20,$<br>$-17 \leq l \leq 17$ | $-10 \leq h \leq 10,$<br>$-19 \leq k \leq 21,$<br>$-20 \leq l \leq 23$ | $-9 \leq h \leq 9,$<br>$-18 \leq k \leq 19,$<br>$-19 \leq l \leq 21$ | $-9 \leq h \leq 9,$<br>$-19 \leq k \leq 17,$<br>$-21 \leq l \leq 21$ | $-8 \leq h \leq 9,$<br>$-19 \leq k \leq 19,$<br>$-21 \leq l \leq 21$ | $-10 \leq h \leq 8,$<br>$-19 \leq k \leq 19,$<br>$-21 \leq l \leq 21$ | $-7 \leq h \leq 9,$<br>$-19 \leq k \leq 19,$<br>$-22 \leq l \leq 22$ |
| Reflections collected                          | 21932                                                                  | 15432                                                                  | 17533                                                                  | 12474                                                                | 13411                                                                | 12606                                                                | 14970                                                                 | 9196                                                                 |
| Independent reflections                        | 6124                                                                   | 4242                                                                   | 2802                                                                   | 1948                                                                 | 2030                                                                 | 1967                                                                 | 2406                                                                  | 2117                                                                 |

|                                                   |                                                             |                                                             |                                                             |                                                             |                                                             |                                                             |                                                             |                                                             |
|---------------------------------------------------|-------------------------------------------------------------|-------------------------------------------------------------|-------------------------------------------------------------|-------------------------------------------------------------|-------------------------------------------------------------|-------------------------------------------------------------|-------------------------------------------------------------|-------------------------------------------------------------|
|                                                   | $[R_{\text{int}} = 0.0311,$<br>$R_{\text{sigma}} = 0.0281]$ | $[R_{\text{int}} = 0.0388,$<br>$R_{\text{sigma}} = 0.0342]$ | $[R_{\text{int}} = 0.0601, R_{\text{sigma}}$<br>$= 0.0431]$ | $[R_{\text{int}} = 0.0618,$<br>$R_{\text{sigma}} = 0.0396]$ | $[R_{\text{int}} = 0.0438,$<br>$R_{\text{sigma}} = 0.0273]$ | $[R_{\text{int}} = 0.0433,$<br>$R_{\text{sigma}} = 0.0291]$ | $[R_{\text{int}} = 0.0425,$<br>$R_{\text{sigma}} = 0.0268]$ | $[R_{\text{int}} = 0.0614,$<br>$R_{\text{sigma}} = 0.0484]$ |
| Data/restraints/parameters                        | 6124/0/333                                                  | 4242/0/333                                                  | 2802/0/150                                                  | 1948/0/150                                                  | 2030/0/147                                                  | 1967/1/151                                                  | 2406/0/150                                                  | 2117/0/146                                                  |
| Goodness-of-fit on $F^2$                          | 1.031                                                       | 1.064                                                       | 1.068                                                       | 1.052                                                       | 1.080                                                       | 1.076                                                       | 1.045                                                       | 1.182                                                       |
| Final R indexes [ $I \geq 2\sigma$<br>(I)]        | $R_1 = 0.0484,$<br>$wR_2 = 0.1259$                          | $R_1 = 0.0333,$<br>$wR_2 = 0.0806$                          | $R_1 = 0.0463,$<br>$wR_2 = 0.0892$                          | $R_1 = 0.0333,$<br>$wR_2 = 0.0831$                          | $R_1 = 0.0368,$<br>$wR_2 = 0.0834$                          | $R_1 = 0.0272,$<br>$wR_2 = 0.0660$                          | $R_1 = 0.0414,$<br>$wR_2 = 0.1023$                          | $R_1 = 0.0759,$<br>$wR_2 = 0.1709$                          |
| Final R indexes [all<br>data]                     | $R_1 = 0.0712,$<br>$wR_2 = 0.1452$                          | $R_1 = 0.0375,$<br>$wR_2 = 0.0840$                          | $R_1 = 0.0952,$<br>$wR_2 = 0.1102$                          | $R_1 = 0.0459,$<br>$wR_2 = 0.0902$                          | $R_1 = 0.0585,$<br>$wR_2 = 0.0934$                          | $R_1 = 0.0362,$<br>$wR_2 = 0.0701$                          | $R_1 = 0.0690,$<br>$wR_2 = 0.1222$                          | $R_1 = 0.1017,$<br>$wR_2 = 0.1845$                          |
| Largest diff. peak/hole /<br>$e \text{ \AA}^{-3}$ | 0.61/-0.50                                                  | 0.36/-0.45                                                  | 0.38/-0.45                                                  | 0.38/-0.28                                                  | 0.29/-0.30                                                  | 0.26/-0.43                                                  | 0.51/-0.84                                                  | 1.86/-1.72                                                  |

**Table S2.** The selected angles ( $^\circ$ ) for complexes **1-8**.

| T/K       | PF <sub>6</sub> |           | AsF <sub>6</sub> |            | SbF <sub>6</sub> |            | BF <sub>4</sub> |           |
|-----------|-----------------|-----------|------------------|------------|------------------|------------|-----------------|-----------|
|           | 298             | 100       | 298              | 100        | 298              | 100        | 100             | 298       |
| O1-Mn1-O2 | 176.19(10)      | 176.13(7) | 176.44(13)       | 176.19(8)  | 176.39(8)        | 178.68(9)  | 176.91(5)       | 179.22(8) |
| O1-Mn1-N1 | 86.90(7)        | 87.09(5)  | 86.93(9)         | 86.97(6)   | 87.10(5)         | 86.91(9)   | 88.57(6)        | 86.74(9)  |
| O2-Mn1-N1 | 91.08(7)        | 90.85(5)  | 91.17(9)         | 91.38(7)   | 90.96(5)         | 94.18(9)   | 94.10(6)        | 93.63(9)  |
| O1-Mn1-N4 | 91.08(7)        | 90.85(5)  | 86.07(10)        | 91.38(6)   | 90.96(5)         | 93.71(10)  | 93.17(6)        | 93.92(9)  |
| O2-Mn1-N4 | 86.90(7)        | 87.09(5)  | 86.92(9)         | 86.97(6)   | 87.10(5)         | 86.68(9)   | 87.85(6)        | 86.62(8)  |
| N1-Mn1-N4 | 116.02(11)      | 115.52(7) | 115.56(14)       | 114.40(10) | 114.97(8)        | 107.40(10) | 100.85(6)       | 107.36(9) |
| O1-Mn1-N3 | 85.92(8)        | 85.91(5)  | 91.18(9)         | 86.14(7)   | 86.02(6)         | 86.30(10)  | 85.68(6)        | 87.82(9)  |
| O2-Mn1-N3 | 97.05(8)        | 97.10(5)  | 96.70(10)        | 96.22(7)   | 96.78(6)         | 92.46(10)  | 91.43(6)        | 91.68(9)  |
| N4-Mn1-N3 | 83.32(9)        | 83.62(5)  | 83.58(11)        | 84.05(7)   | 83.78(6)         | 87.21(11)  | 89.23(6)        | 84.92(9)  |
| O1-Mn1-N2 | 97.05(8)        | 97.10(5)  | 96.70(10)        | 86.14(7)   | 96.78(6)         | 91.54(11)  | 91.01(6)        | 92.83(9)  |
| O2-Mn1-N2 | 85.92(8)        | 85.92(5)  | 86.07(10)        | 96.22(7)   | 86.02(6)         | 87.82(10)  | 87.62(6)        | 86.50(9)  |

|           |                  |            |            |            |            |            |            |            |
|-----------|------------------|------------|------------|------------|------------|------------|------------|------------|
| N1-Mn1-N2 | 83.32(9)         | 83.62(5)   | 83.58(11)  | 84.05(8)   | 83.78(6)   | 84.74(10)  | 86.53(6)   | 87.41(10)  |
| N3-Mn1-N2 | 78.54(14)        | 78.38(8)   | 78.40(17)  | 78.55(12)  | 78.56(8)   | 81.26(11)  | 83.82(6)   | 80.93(10)  |
| N1-Mn1-N3 | 159.49(8)        | 159.71(5)  | 159.74(11) | 160.13(6)  | 160.45(8)  | 160.91(15) | 164.26(10) | 168.66(6)  |
| N2-Mn1-N4 | 159.49(8)        | 159.71(5)  | 159.74(11) | 160.13(6)  | 160.45(8)  | 160.91(15) | 167.00(10) | 171.59(6)  |
|           | ClO <sub>4</sub> |            | Cl         |            | Br         |            | I          |            |
| T/K       | 100              | 298        | 100        | 298        | 100        | 298        | 100        | 298        |
| O1-Mn1-O2 | 178.49(6)        | 178.53(9)  | 177.84(9)  | 179.31(12) | 177.18(16) | 178.8(2)   | 176.1(4)   | 177.9(2)   |
| O1-Mn1-N1 | 87.13(6)         | 87.06(7)   | 87.73(7)   | 86.67(9)   | 88.01(13)  | 86.29(16)  | 87.9(3)    | 86.28(15)  |
| O2-Mn1-N1 | 94.01(6)         | 93.82(7)   | 93.69(7)   | 93.77(9)   | 93.87(13)  | 94.45(18)  | 94.7(3)    | 94.95(17)  |
| O1-Mn1-N4 | 93.31(7)         | 93.82(7)   | 93.69(7)   | 93.77(9)   | 93.87(13)  | 94.45(18)  | 94.7(3)    | 94.95(17)  |
| O2-Mn1-N4 | 87.33(6)         | 87.06(7)   | 87.73(7)   | 86.67(9)   | 88.01(13)  | 86.29(16)  | 87.9(3)    | 86.28(15)  |
| N1-Mn1-N4 | 105.77(7)        | 107.22(12) | 97.57(10)  | 102.85(13) | 96.82(19)  | 104.0(2)   | 97.0(5)    | 106.7(2)   |
| O1-Mn1-N3 | 85.96(7)         | 85.76(7)   | 86.42(7)   | 86.77(9)   | 85.65(13)  | 86.21(16)  | 85.2(3)    | 85.04(16)  |
| O2-Mn1-N3 | 92.69(7)         | 93.12(8)   | 91.99(7)   | 92.71(9)   | 92.27(13)  | 92.88(17)  | 91.9(3)    | 93.39(18)  |
| N4-Mn1-N3 | 87.85(7)         | 86.01(9)   | 88.95(8)   | 87.50(10)  | 89.43(14)  | 87.26(18)  | 89.3(4)    | 86.60(19)  |
| O1-Mn1-N2 | 91.22(7)         | 93.12(8)   | 91.99(7)   | 92.71(9)   | 92.27(13)  | 92.88(17)  | 91.9(3)    | 93.39(18)  |
| O2-Mn1-N2 | 87.90(7)         | 85.76(7)   | 86.42(7)   | 86.77(9)   | 85.65(13)  | 86.21(16)  | 85.2(3)    | 85.04(16)  |
| N1-Mn1-N2 | 84.99(7)         | 86.01(9)   | 88.95(8)   | 87.50(10)  | 89.43(14)  | 87.26(18)  | 89.3(4)    | 86.60(19)  |
| N3-Mn1-N2 | 81.94(7)         | 81.65(13)  | 85.11(11)  | 82.87(14)  | 85.0(2)    | 82.4(3)    | 85.2(5)    | 81.3(3)    |
| N1-Mn1-N3 | 165.07(7)        | 166.87(9)  | 168.07(10) | 171.51(7)  | 171.38(14) | 166.89(17) | 171.0(4)   | 164.67(19) |
| N2-Mn1-N4 | 168.51(7)        | 164.06(9)  | 168.07(10) | 171.51(7)  | 171.38(14) | 166.90(17) | 171.0(4)   | 164.67(19) |

**Table S3.** Hydrogen bond distances for complexes **1-8** (Å, °).

|                          |              |           |           |            |           |              |         |          |            |           |
|--------------------------|--------------|-----------|-----------|------------|-----------|--------------|---------|----------|------------|-----------|
| <b>1-PF<sub>6</sub></b>  | 100K         |           |           |            |           | 298K         |         |          |            |           |
|                          | D-H...A      | D-H       | H...A     | D...A      | D-H...A   | D-H...A      | D-H     | H...A    | D...A      | D-H...A   |
|                          | N2-H11...F1  | 0.84(2)   | 2.38(2)   | 3.2050(19) | 169.6(15) | N2-H11...F1  | 0.78(3) | 2.46(3)  | 3.236(3)   | 171.6(15) |
| <b>2-AsF<sub>6</sub></b> | 100K         |           |           |            |           | 298K         |         |          |            |           |
|                          | D-H...A      | D-H       | H...A     | D...A      | D-H...A   | D-H...A      | D-H     | H...A    | D...A      | D-H...A   |
|                          | N2-H11...F1  | 0.86(2)   | 2.37(2)   | 3.220(2)   | 168(2)    | N2-H11...F1  | 0.84(4) | 2.40(4)  | 3.237(4)   | 173(3)    |
| <b>3-SbF<sub>6</sub></b> | 100K         |           |           |            |           | 298K         |         |          |            |           |
|                          | D-H...A      | D-H       | H...A     | D...A      | D-H...A   | D-H...A      | D-H     | H...A    | D...A      | D-H...A   |
|                          | N2-H11...F1  | 0.99(5)   | 2.32(5)   | 3.305(6)   | 174(4)    | N2-H11...F1  | 0.82(3) | 2.48(3)  | 3.3.288(3) | 172(2)    |
| <b>4-BF<sub>4</sub></b>  | 100K         |           |           |            |           | 298K         |         |          |            |           |
|                          | D-H...A      | D-H       | H...A     | D...A      | D-H...A   | D-H...A      | D-H     | H...A    | D...A      | D-H...A   |
|                          | N2-H11...F4  | 0.86(2)   | 2.322(2)  | 2.982(2)   | 134.2(18) | N2-H11...F4  | 0.84(4) | 2.42(4)  | 3.100(5)   | 139(3)    |
| <b>5-ClO<sub>4</sub></b> | 100K         |           |           |            |           | 298K         |         |          |            |           |
|                          | D-H...A      | D-H       | H...A     | D...A      | D-H...A   | D-H...A      | D-H     | H...A    | D...A      | D-H...A   |
|                          | N2-H11...O5  | 0.83(3)   | 2.39(3)   | 3.092(3)   | 144(2)    | N2-H11...O5  | 0.80(4) | 2.539(4) | 3.197(5)   | 141(3)    |
| <b>6-Cl</b>              | 100K         |           |           |            |           | 298K         |         |          |            |           |
|                          | D-H...A      | D-H       | H...A     | D...A      | D-H...A   | D-H...A      | D-H     | H...A    | D...A      | D-H...A   |
|                          | N2-H11...Cl1 | 0.89      | 2.54(2)   | 3.24(3)    | 136(3)    | N2-H11...Cl1 | 0.879   | 2.547    | 3.266(4)   | 139.59    |
| <b>7-Br</b>              | 100K         |           |           |            |           | 298K         |         |          |            |           |
|                          | D-H...A      | D-H       | H...A     | D...A      | D-H...A   | D-H...A      | D-H     | H...A    | D...A      | D-H...A   |
|                          | N2-H13...Br1 | 0.75(5)   | 2.69(5)   | 3.304(4)   | 142(5)    | N2-H13...Br1 | 0.98    | 2.59     | 3.345(5)   | 134       |
| <b>8-I</b>               | 100K         |           |           |            |           | 298K         |         |          |            |           |
|                          | D-H...A      | D-H       | H...A     | D...A      | D-H...A   | D-H...A      | D-H     | H...A    | D...A      | D-H...A   |
|                          | N2-H13...I1  | 0.930(14) | 2.797(10) | 3.485(10)  | 131.7(9)  | N2-H13...I1  | 0.71(7) | 2.92(7)  | 3.555(5)   | 151(6)    |

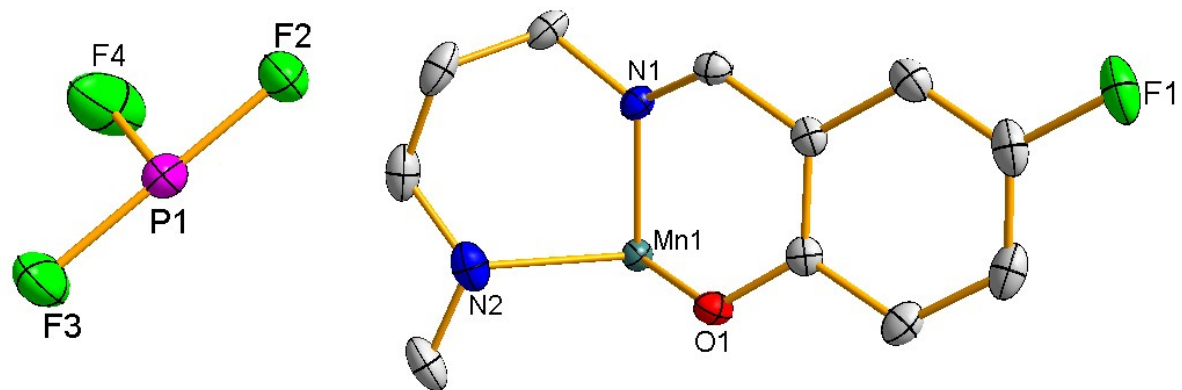

**Figure S1.** The molecular structure for complex **1** at 100K, hydrogen atoms have been omitted for clarity. Ellipsoids at 30% probability.

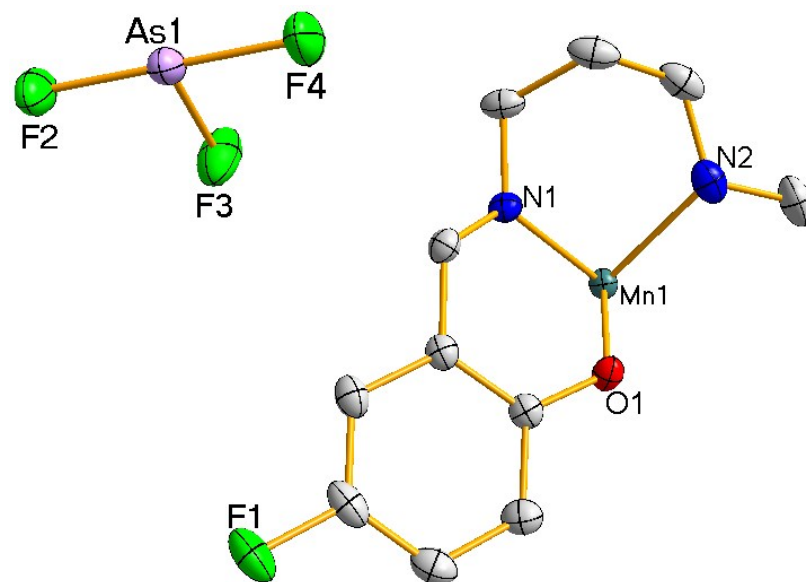

**Figure S2.** The molecular structure for complex **2** at 100 K, hydrogen atoms have been omitted for clarity. Ellipsoids at 30% probability.

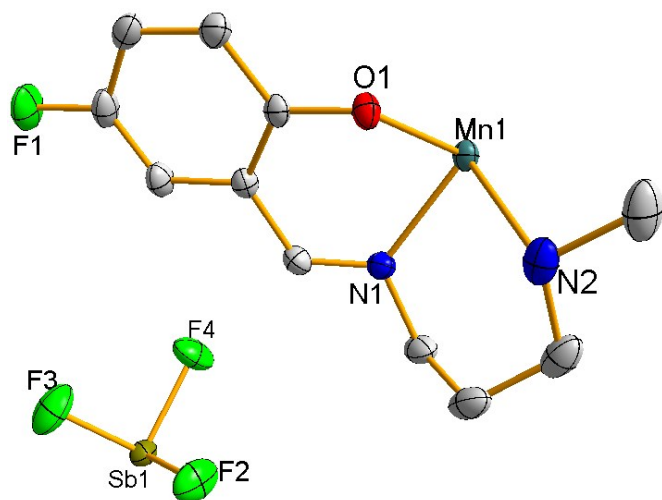

**Figure S3.** The molecular structure for complex 3 at 100 K, hydrogen atoms have been omitted for clarity. Ellipsoids at 30% probability.

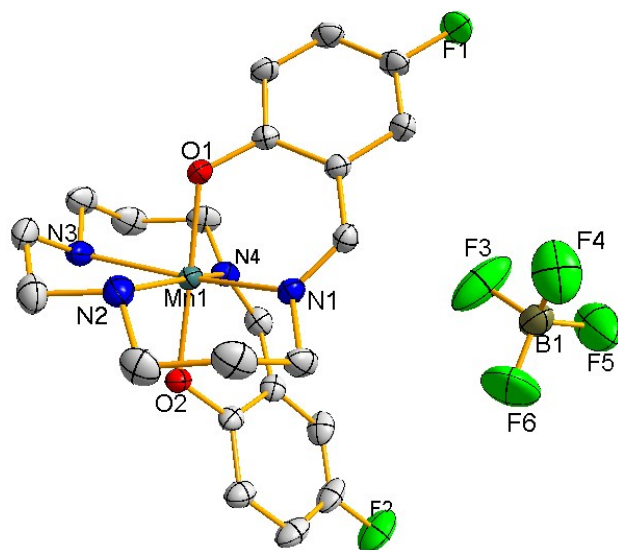

**Figure S4.** The molecular structure for complex 4 at 100K, hydrogen atoms have been omitted for clarity. Ellipsoids at 30% probability.



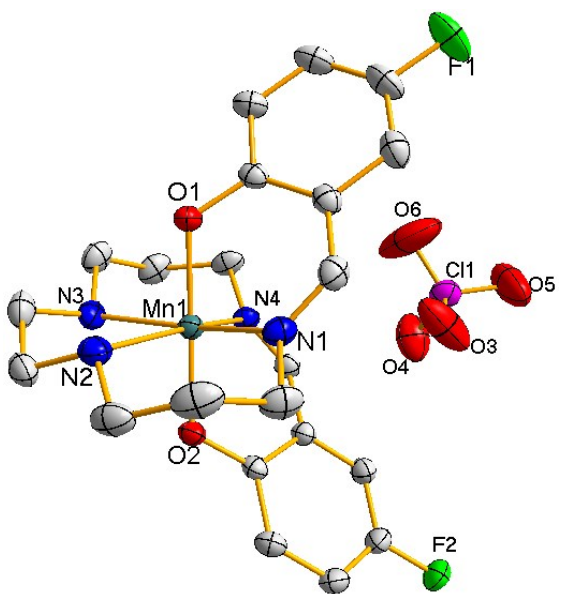

**Figure S5.** The molecular structure for complex **5** at 100 K, hydrogen atoms have been omitted for clarity. Ellipsoids at 30% probability.

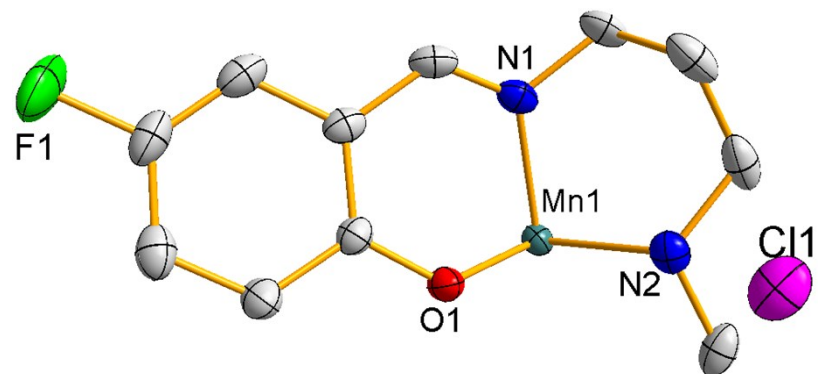

**Figure S6.** The molecular structure for complex **6** at 100 K, hydrogen atoms have been omitted for clarity. Ellipsoids at 30% probability.

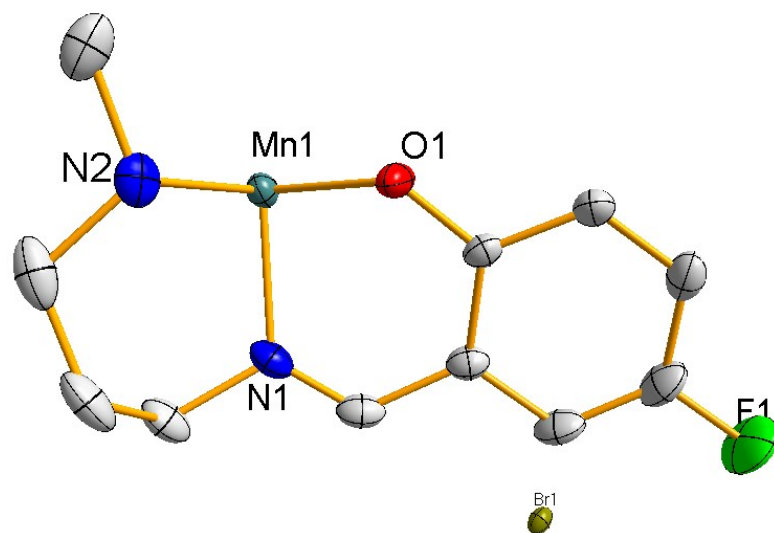

**Figure S7.** The molecular structure for complex **7** at 100 K, hydrogen atoms have been omitted for clarity. Ellipsoids at 30% probability.

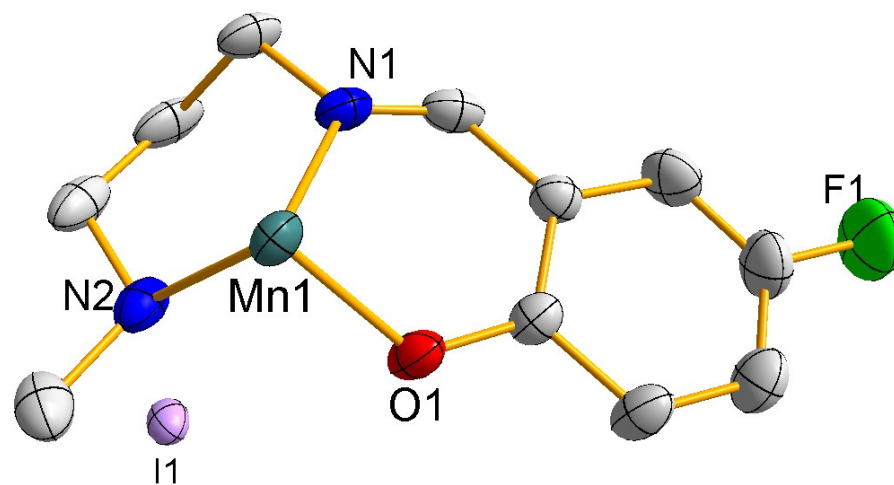

**Figure S8.** The molecular structure for complex **8** at 100 K, hydrogen atoms have been omitted for clarity. Ellipsoids at 30% probability.

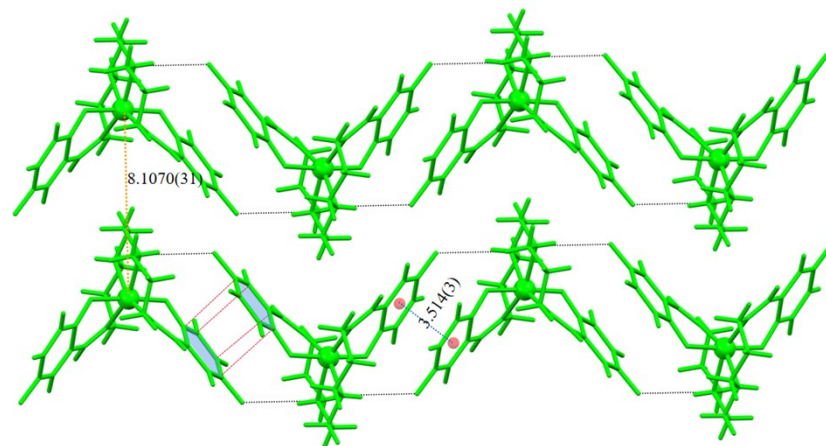

**Figure S9.** The details of the sublattice formed by the  $[\text{Mn}(5\text{-F-sal-N-1,5,8,12})]^+$  chains of complex **1** at 298 K. The interchain  $\text{Mn}\cdots\text{Mn}$  distance is 8.11 Å (orange dotted line). The  $\pi$ - $\pi$  stacking between the phenolate groups with centroid-centroid distance of 3.514(3) Å and ring-ring distance of 3.367(2) Å (blue).

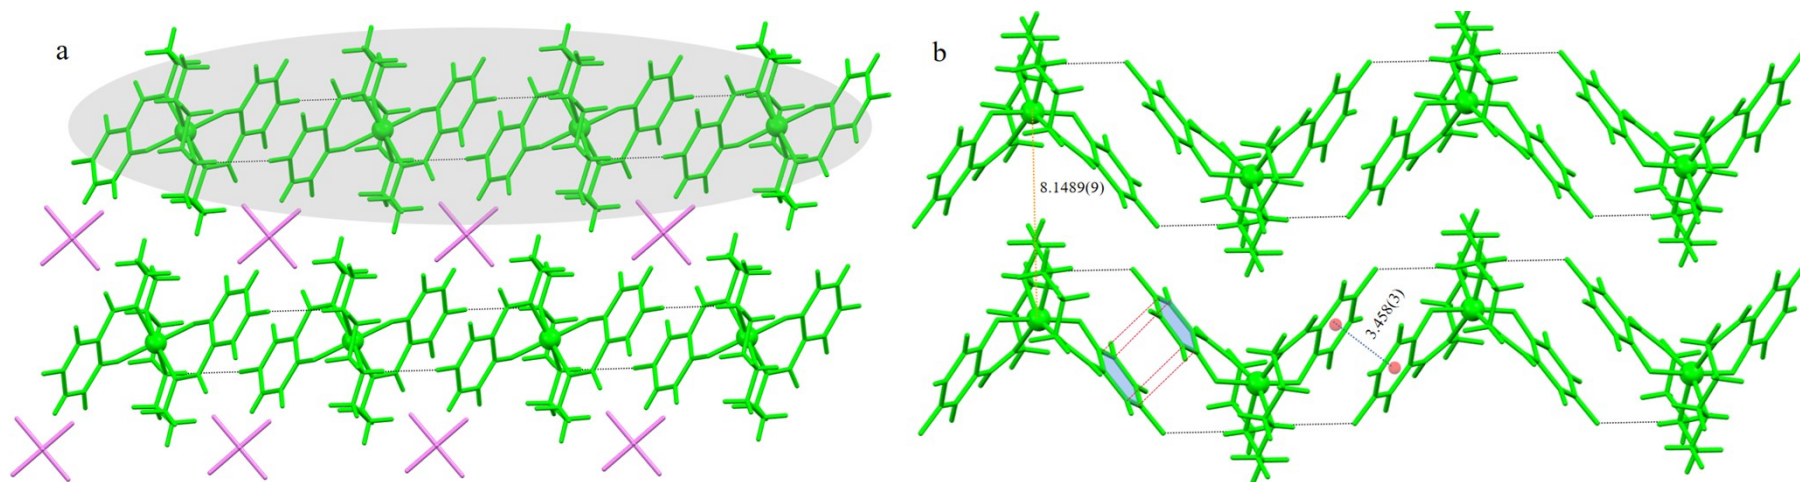

**Figure S11.** (a) Crystal packing along the  $b$  axis, showing the  $\text{N}_{\text{am}}\text{-H}\cdots\text{F}_{\text{ph}}$  hydrogen bonds between the  $[\text{Mn}(5\text{-F-sal-N-1,5,8,12})]^+$  cations for complex **2** at 100 K. (b) The details of the sublattice formed by the  $[\text{Mn}(5\text{-F-sal-N-1,5,8,12})]^+$  chains (gray). The interchain  $\text{Mn}\cdots\text{Mn}$  distance is 8.15 Å (orange dotted line). The  $\pi$ - $\pi$  stacking between the phenolate groups with centroid-centroid distance of 3.458(3) Å and ring-ring distance of 3.329(1) Å (blue).

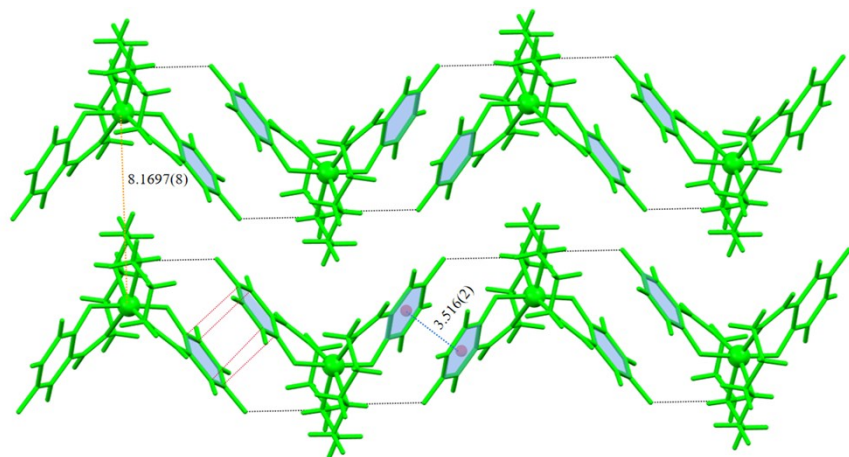

**Figure S12.** The details of the sublattice formed by the  $[\text{Mn}(5\text{-F-sal-N-1,5,8,12})]^+$  chains of **2**. The interchain  $\text{Mn}\cdots\text{Mn}$  distance is 8.17 Å (orange dotted line). The  $\pi$ - $\pi$  stacking between the phenolate groups with centroid-centroid distance of 3.516(2) Å and ring-ring distance of 3.379(2) Å (blue) at 298 K.

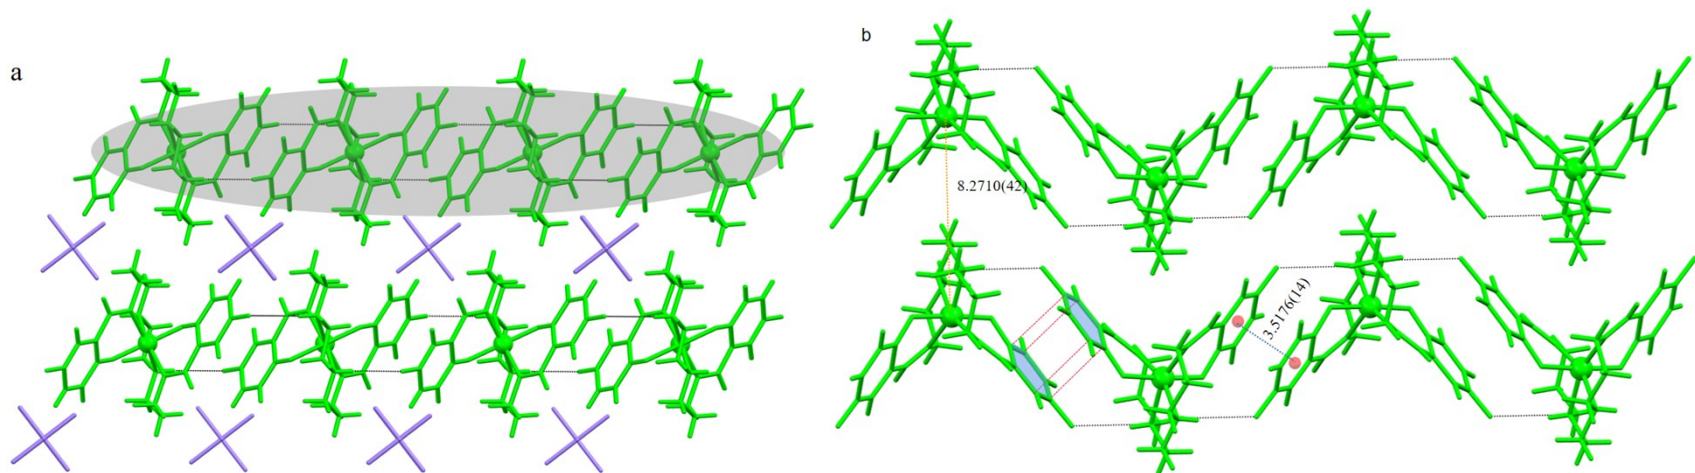

**Figure S13.** (a) Crystal packing along the  $b$  axis, showing the  $\text{N}_{\text{am}}\text{-H}\cdots\text{F}_{\text{ph}}$  hydrogen bonds between the  $[\text{Mn}(5\text{-F-sal-N-1,5,8,12})]^+$  cations for complex **3** at 100 K. (b) The details of the sublattice formed by the  $[\text{Mn}(5\text{-F-sal-N-1,5,8,12})]^+$  chains (gray). The interchain  $\text{Mn}\cdots\text{Mn}$  distance is 8.27 Å (orange dotted line). The  $\pi$ - $\pi$  stacking between the phenolate groups with centroid-centroid distance of 3.5176(14) Å and ring-ring distance of 3.3991(12) Å (blue).



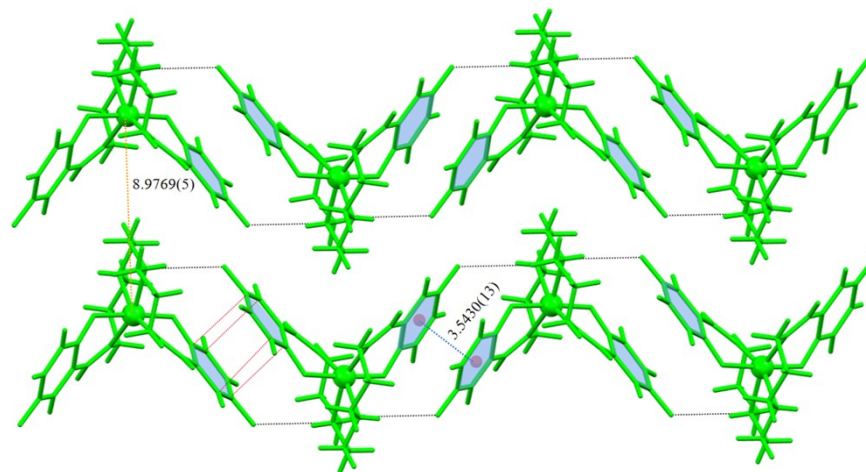

**Figure S14.** The details of the sublattice formed by the  $[\text{Mn}(5\text{-F-sal-N-1,5,8,12})]^+$  chains of **3** at 298 K. The interchain  $\text{Mn}\cdots\text{Mn}$  distance is 8.98 Å (orange dotted line). The  $\pi$ - $\pi$  stackings between the phenolate groups with centroid-centroid distance of 3.5430(13) Å and ring-ring distance of 3.4202(10) Å (blue).

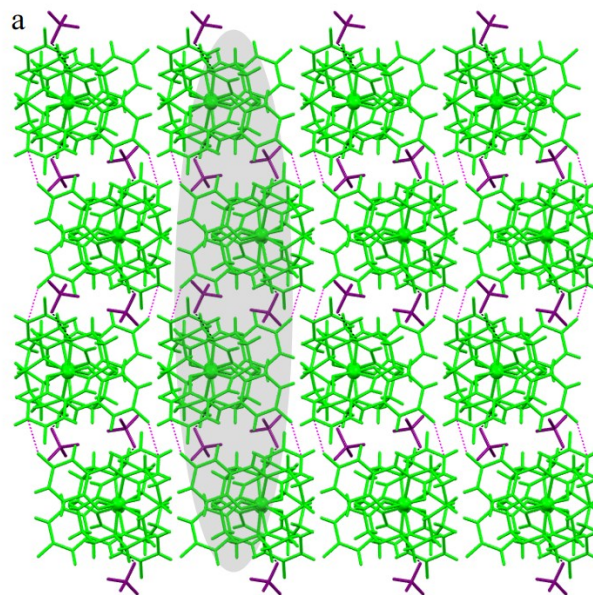

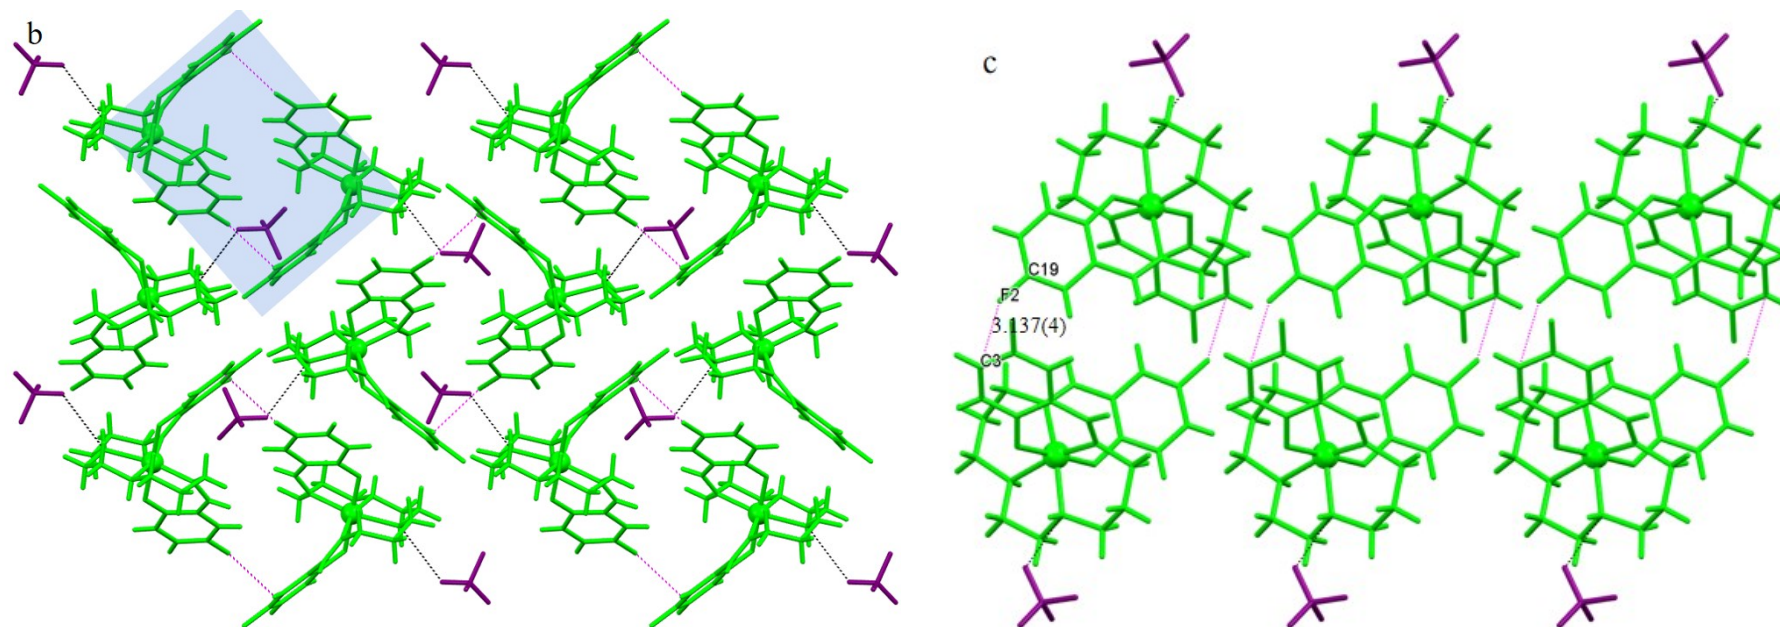

**Figure S15.** (a) Crystal packing of complex **4** at 295 K, viewed along the *c* axis, showing the N<sub>am</sub>-H...F<sub>BF4</sub> hydrogen bonds (black dotted line) between the [Mn(5-F-sal-N-1,5,8,12)]<sup>+</sup> cations and BF<sub>4</sub><sup>-</sup> anions and the lone pair...π interactions (magenta dotted line) among the cations. (b) The details of the chain (gray) along the *a* axis. (c) The details of the lone pair...π interactions (blue) between the [Mn(5-F-sal-N-1,5,8,12)]<sup>+</sup> cations characterized by the contact distances C3...F2 = 3.137(4) Å.

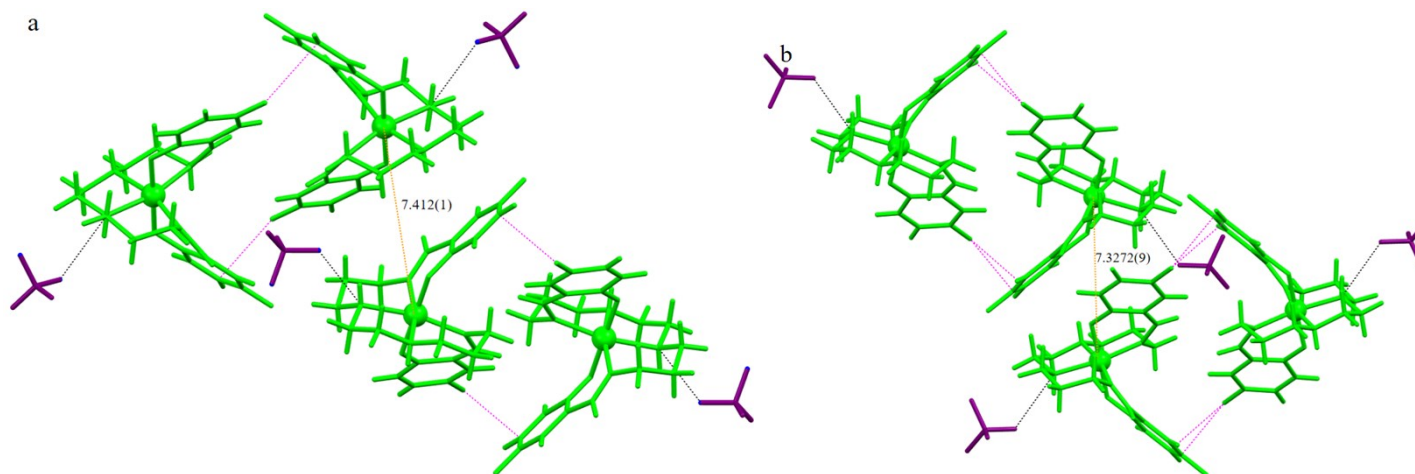

**Figure S16.** The interchain Mn...Mn distance indicated by a gray dotted line of complex **4**, it is 7.41 Å at 298 K (a) and 7.33 Å at 100 K (b), respectively.

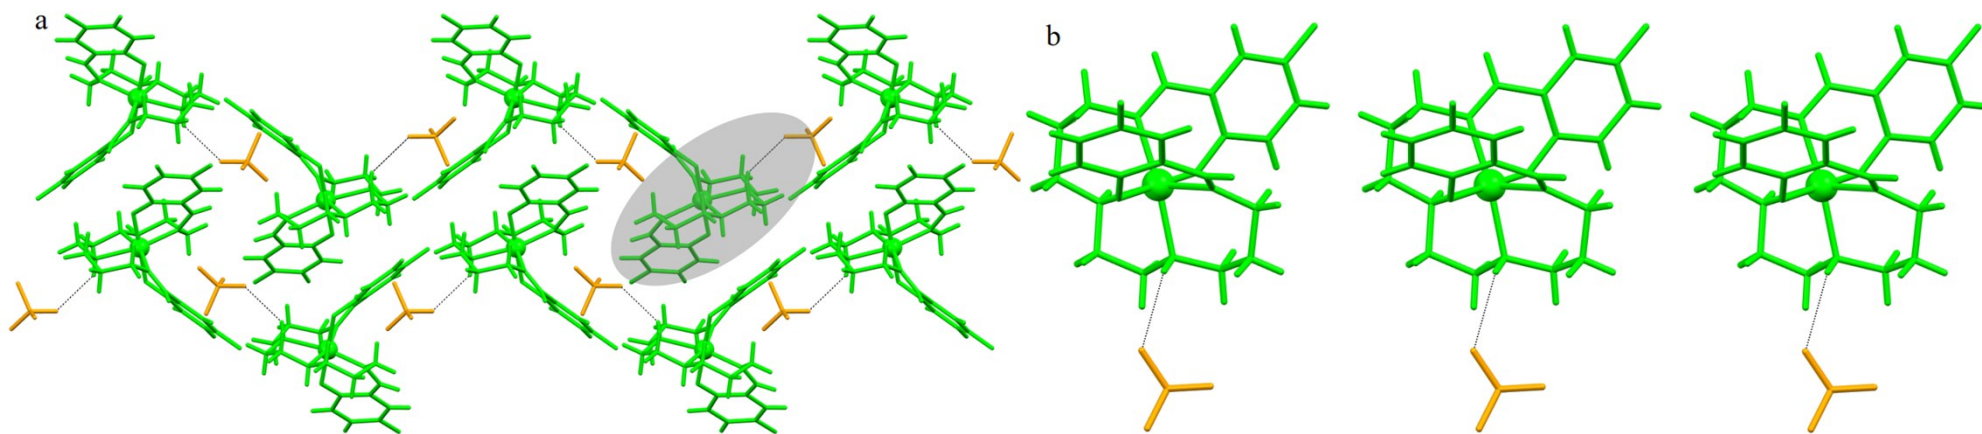

**Figure S17.** (a) Crystal packing of complex **5** at 295 K, viewed along the *a* axis, showing the  $N_{am}-H \cdots O_{ClO_4}$  (black) hydrogen bonds between the  $[Mn(5-F-sal-N-1,5,8,12)]^+$  cations and  $ClO_4^-$ . (b) The details of the sublattice along the *c* axis (gray).



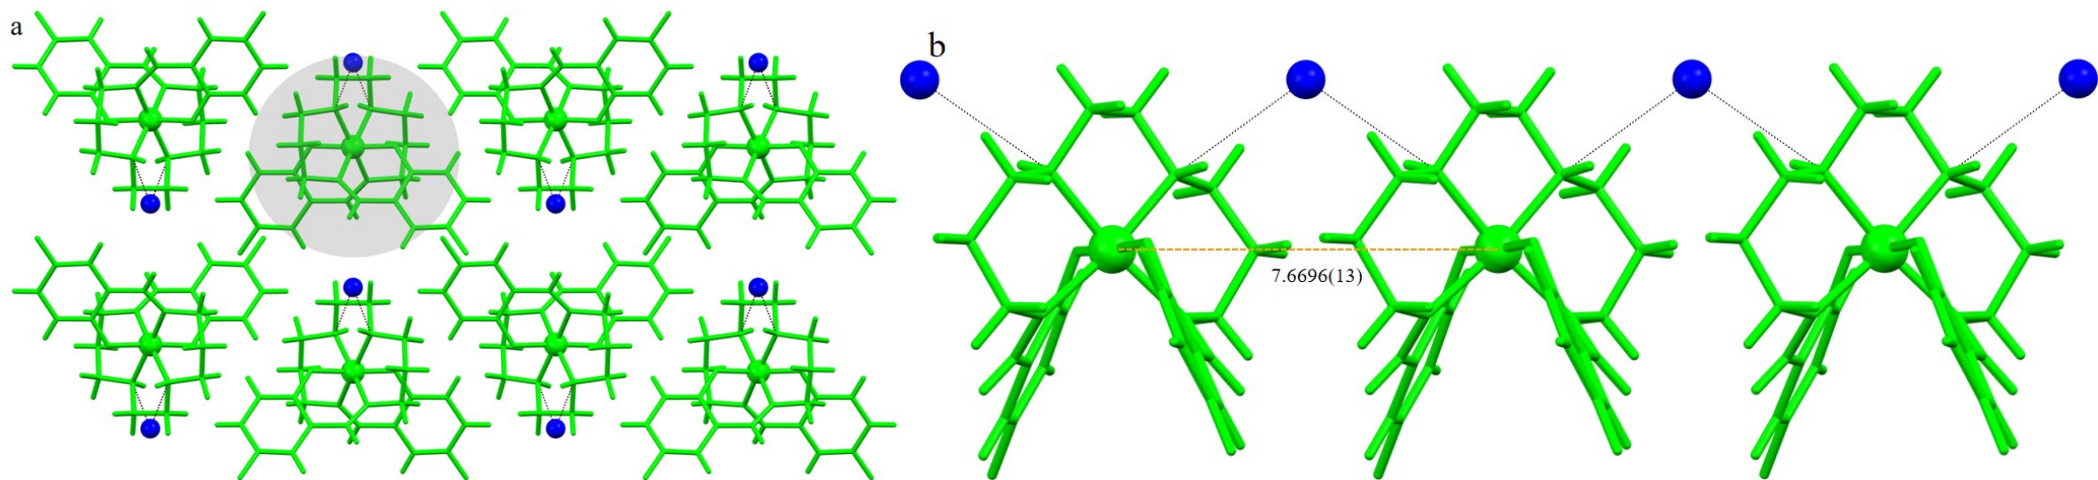

**Figure S18.** (a) Crystal packing of complex **7** at 100 K, viewed along the *a* axis, showing the N<sub>am</sub>-H...Br hydrogen bonds between the [Mn(5-F-sal-N-1,5,8,12)]<sup>+</sup> cations and Br<sup>-</sup> anions, (b) The details of the sublattice viewed along the *b* axis formed by the [Mn(5-F-sal-N-1,5,8,12)]<sup>+</sup> and Br<sup>-</sup>. The intrachain Mn...Mn distance is 7.67 Å at 100 K and 8.04 Å at 298 K.

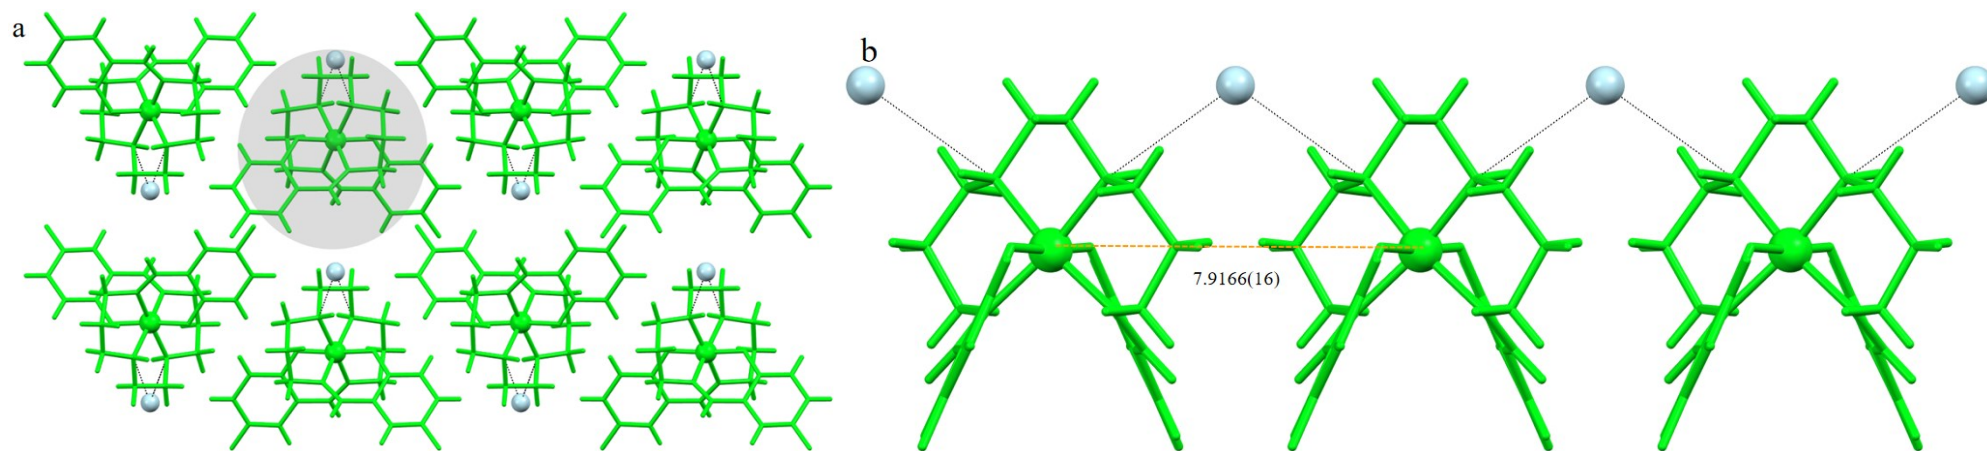

**Figure S19.** (a) Crystal packing of complex **8** at 100 K, viewed along the *a* axis, showing the N<sub>am</sub>-H...I hydrogen bonds between the [Mn(5-F-sal-N-1,5,8,12)]<sup>+</sup> cations and I<sup>-</sup> anions, (b) The details of the sublattice viewed along the *b* axis formed by the [Mn(5-F-sal-N-1,5,8,12)]<sup>+</sup> and I<sup>-</sup>. The intrachain Mn...Mn distance is 7.92 Å at 100 K and 8.52 Å at 298 K.



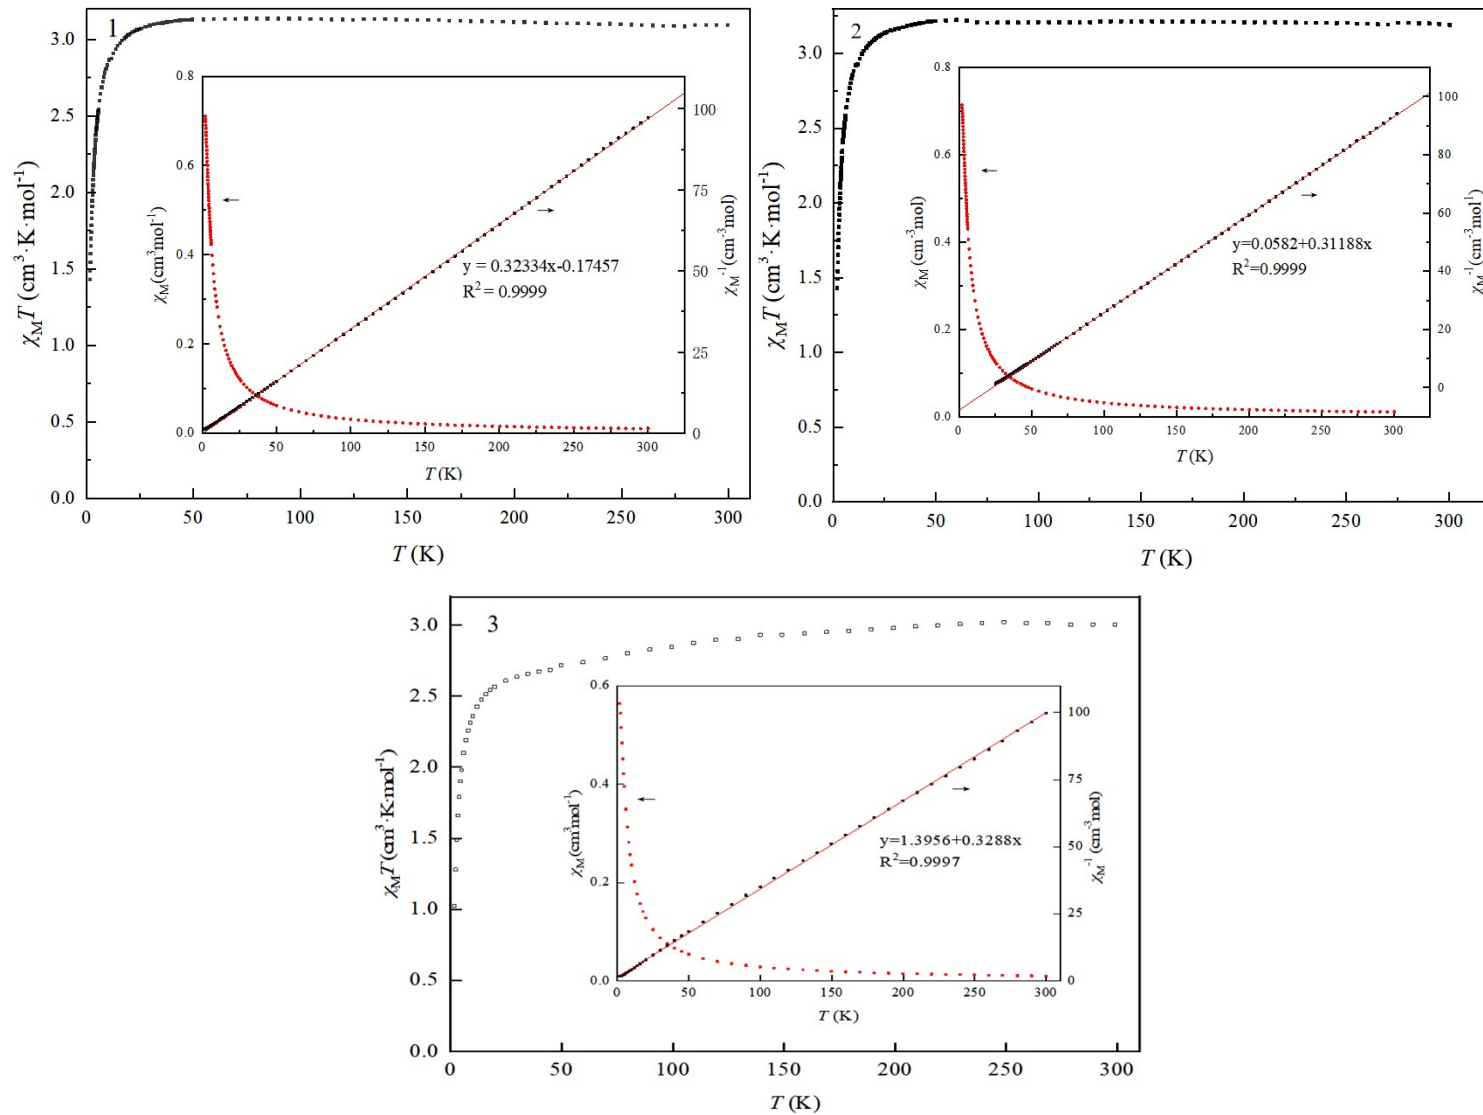

**Figure S20.** Thermal dependence of the  $\chi_M T$  of complexes **1-3**, Insets: thermal dependence of  $1/\chi_M$  (red circles) and best fit to the Curie-Weiss expression (solid red line).
